# Supplementary material for: Defined neuronal populations drive fatal phenotype in a mouse model of Leigh syndrome
Source: eLife journal article supplement (doi:10.7554/elife.47163), 2019-08-12
Supplement: supp [file elife-47163-supp-v1.zip]

Archive with 12 entries (12 files):
- elife_poa_e47163_Figure_1_figure_supplement_2.tif
- elife_poa_e47163_Video_1.mp4
- elife_poa_e47163_Figure_7_figure_supplement_1.tif
- elife_poa_e47163_Figure_3_figure_supplement_1.tif
- elife_poa_e47163_Figure_2_figure_supplement_2.tif
- elife_poa_e47163_Supplementary_file_1.xlsx
- elife_poa_e47163_Figure_2_figure_supplement_1.tif
- elife_poa_e47163_Figure_1_figure_supplement_3.tif
- elife_poa_e47163_Figure_1_figure_supplement_1.tif
- elife_poa_e47163_Transparent_Reporting_File.pdf
- elife_poa_e47163_Figure_7_figure_supplement_2.tif
- elife_poa_e47163_Video_2.mp4
