# Supplementary material for: Defined neuronal populations drive fatal phenotype in a mouse model of Leigh syndrome
Source: eLife journal article supplement (doi:10.7554/elife.47163), 2019-08-12
Supplement: supp [file elife-47163-supp-v1.zip › elife_poa_e47163_Supplementary_file_1.xlsx]

## Sheet: Supplementary File 1a
Statistical paramenters for two group comparisons (two-tailed unpaired t-Test or Mann-Whitney Test).
	Parameter	Figure.panel	P	t, df or Mann-Whitney U
	Food intake	Figure 1I	0.0029	t=3,806 df=11
	Food intake	Figure 1J	0.0417	t=2,693 df=5,176 (Welch-corrected)
	Active caspase-8/b-actin ratio	Figure 2F	0.0466	t=2,847 df=4
	Fold change	Figure 2G	0.4413	t=0,8539 df=4
	Fold change	Figure 2H	0.0519	t=2,741 df=4
	Total distance	Figure 3.D	< 0,0001	t=11,18 df=104
	Speed	Figure 3.E	< 0,0001	t=10,94 df=104
	Total distance	Figure 3.G	0.549	t=0,6147 df=13,55 (Welch-corrected)
	Speed	Figure 3.H	0.5347	t=0,6365 df=14,08 (Welch-corrected)
	% occupied end plates	Figure 3.J	0.2	0
	% occupied end plates	Figure 3.K	0.9999	4
	fR	Figure 4.E	0.8274	t=0,2233 df=11
	VT	Figure 4.F	0.9009	t=0,1274 df=11
	Food intake	Figure S2.B (left)	0.0885	t=1,869 df=11
	Food intake	Figure S2.B (right)	0.8577	t=0,1860 df=7

## Sheet: Supplementary File 1b
Statistical parameters for two-way ANOVA
	Parameter	Figure	Factor 1 F(DFn, DFd)	Factor 2 F(DFn, DFd)	Interaction	Factor 1 P value	Factor 2 P value	Interaction P value
	Body Weight	Figure 1.C	Age F (13, 523)=68.76	Genotype F(1, 523)=142.4	F (13, 523)=6,004	P < 0,0001	P < 0,0001	P < 0,0001
	Body Weight	Figure 1.D	Age F (13, 539) = 42,85	Genotype F (1, 539) = 160,7	F (13, 539) = 3,087	P < 0,0001	P < 0,0001	P = 0,0002
	Body Weight	Figure 1.E	Age F (8, 243) = 289,4	Genotype F (1, 243) = 23,80	F (8, 243) = 7,636	P < 0,0001	P < 0,0001	P < 0,0001
	Body Weight	Figure 1.F	Age F (6, 196) = 126,0	Genotype F (1, 196) = 16,65	F (6, 196) = 4,936	P < 0,0001	P < 0,0001	P < 0,0001
	Latency to fall	Figure 3.A	Age F (2, 48) = 1,666	Genotype F (1, 48) = 26,02	F (2, 48) = 1,721	P = 0,1998	P < 0,0001	P = 0,1897
	Latency to fall	Figure 3.B	Age F (2, 35) = 2,093	Genotype F (1, 35) = 0,3363	F (2, 35) = 0,2168	P = 0,1385	P = 0,5657	P = 0,8062
	Firing rate	Figure 5.B	Activity F (1, 27) = 41,53	Genotype F (1, 27) = 21,93	F (1, 27) = 17,47	P < 0,0001	P < 0,0001	P = 0,0003
	Temperature	Figure 6.A	Age F(2,37)=101,8	Genotype F (1,37 ) =38,67	F(2,37)=5,524	P < 0,0001	P < 0,0001	P = 0,0080
	Temperature	Figure 6.B	Age F(2,41)=25,52	Genotype F (1,41 ) =318,4	F(2,41)=5,016	P < 0,0001	P < 0,0001	P = 0,0113
	Epileptiform events/hour	Figure 7.C	Event F (1, 24) = 2,528	Genotype F (1, 24) = 19,18	F (1, 24) = 2,528	P = 0,1249	P = 0,0002	P = 0,1249
	Body Weight	Figure S1.B	Age F (17, 86) = 41,54	Genotype F (1, 86) = 2,731	F (17, 86) = 0,3126	P < 0,0001	P = 0,1021	P = 0,9955
	Latency to fall	Figure S1.C	Session F (2, 54) = 16,32	Genotype F (1, 54) = 0,009074	F (2, 54) = 0,02261	P < 0,0001	P = 0,9245	P = 0,9777
	Total distance	Figure S6.A	Age F (3, 114) = 7,315	Genotype F (1, 114) = 146,9	F (3, 114) = 5,471	P = 0,0002	P < 0,0001	P = 0,0015
	Speed	Figure S6.B	Age F (3, 88) = 5,599	Genotype F (1, 88) = 134,5	F (3, 88) = 1,794	P = 0,0015	P < 0,0001	P = 0,1543

## Sheet: Supplementary File 1c
Statistical parameters for one-way ANOVA
	Parameter	Figure.panel	P value	F (DFn, DFd)
	fR	Figure 4.C	0.0003	F (3, 32) = 8,327
	VT	Figure 4.D	0.0014	F (3, 36) = 6,368

## Sheet: Supplementary File 1d
Statistical parameters for Log-rank (Mantel-Cox) tests.
	Analysis	Figure.panel	P value	Chi square	df
	Log-rank (Mantel-Cox) test	Figure 1.B	< 0,0001	97.72	2
	Log-rank (Mantel-Cox) test	Figure S3.B	0.0301	4.701	1
	Log-rank (Mantel-Cox) test	Figure S8	0.4189	2.828	3
