# Supplementary figures and images for: Defined neuronal populations drive fatal phenotype in a mouse model of Leigh syndrome
Source: eLife journal article supplement (doi:10.7554/elife.47163), 2019-08-12

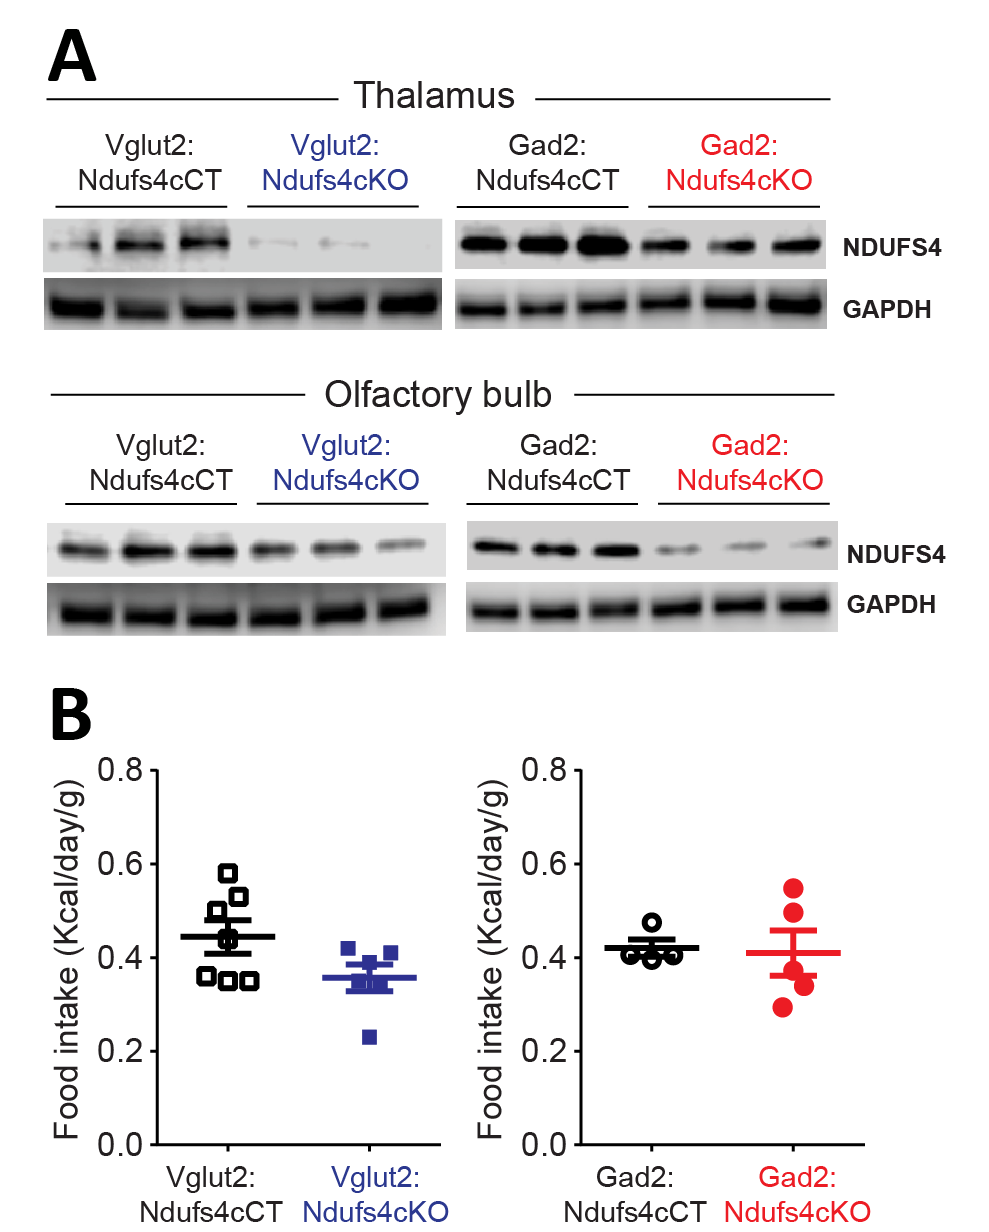

Supplement: supp [file elife-47163-supp-v1.zip › elife_poa_e47163_Figure_1_figure_supplement_2.tif]

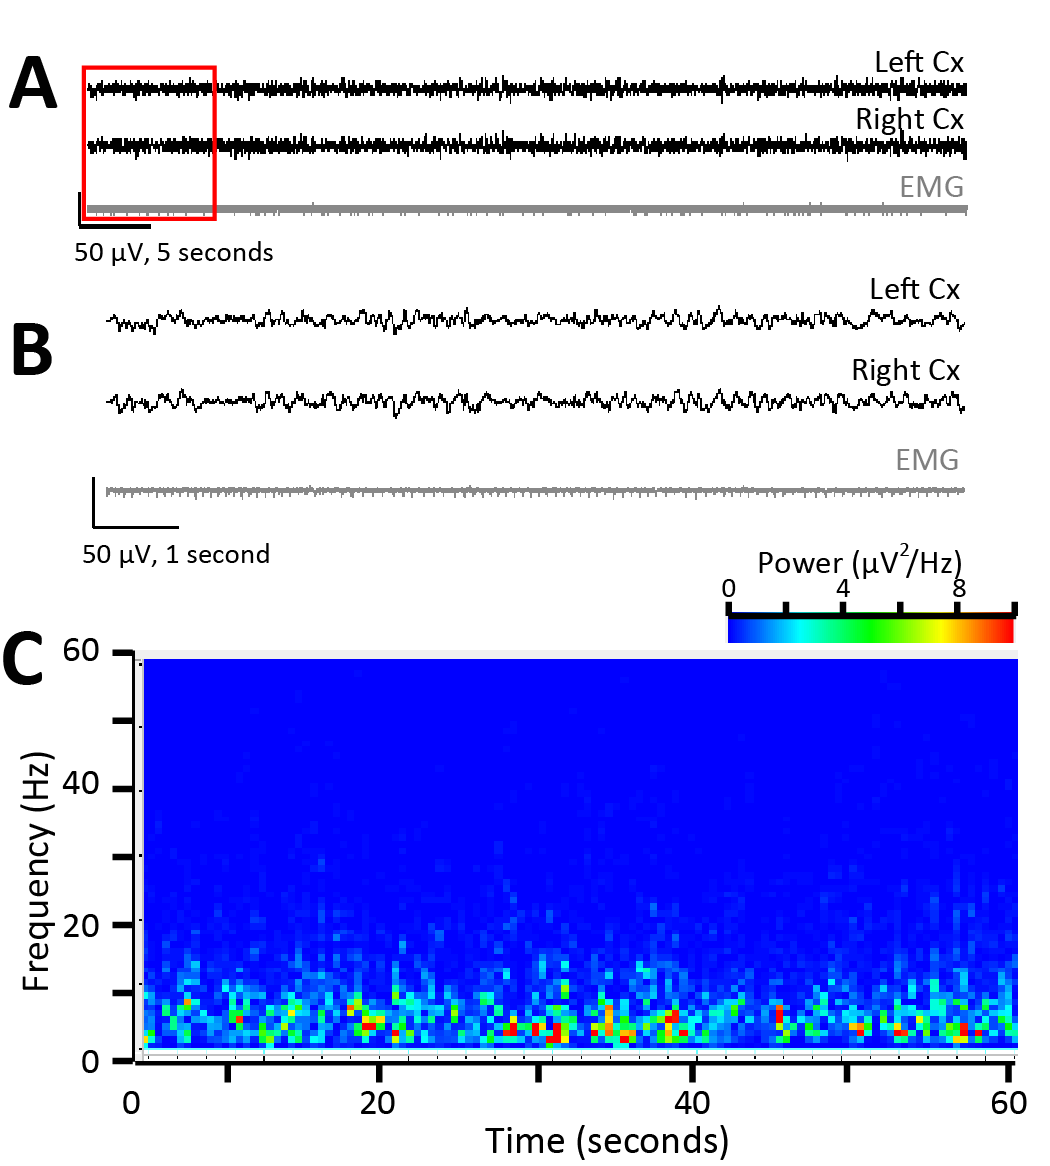

Supplement: supp [file elife-47163-supp-v1.zip › elife_poa_e47163_Figure_7_figure_supplement_1.tif]

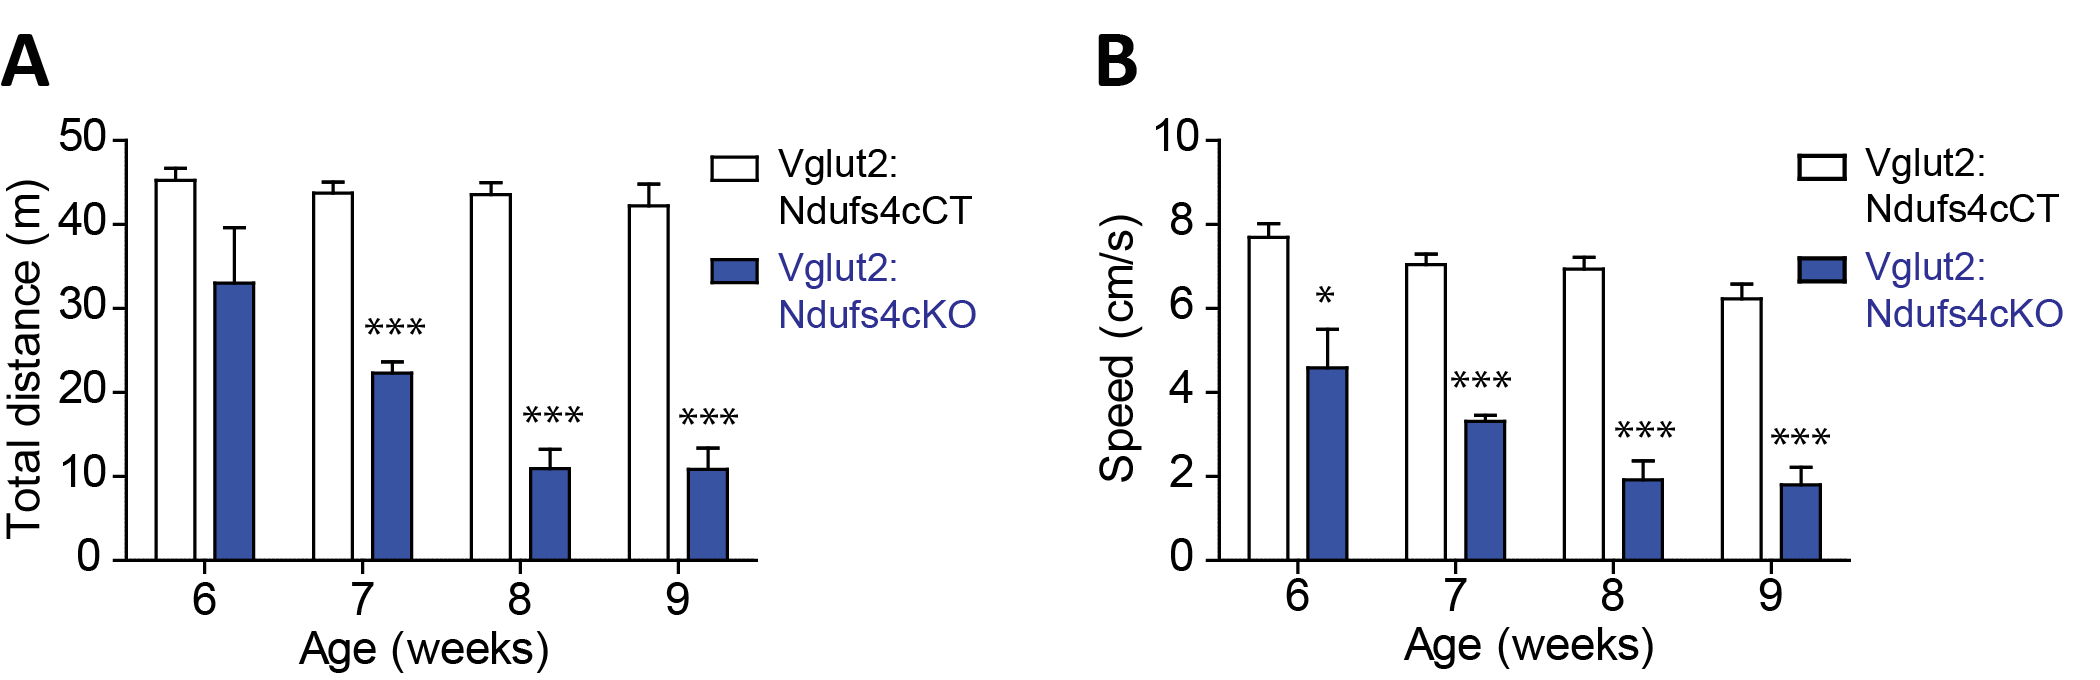

Supplement: supp [file elife-47163-supp-v1.zip › elife_poa_e47163_Figure_3_figure_supplement_1.tif]

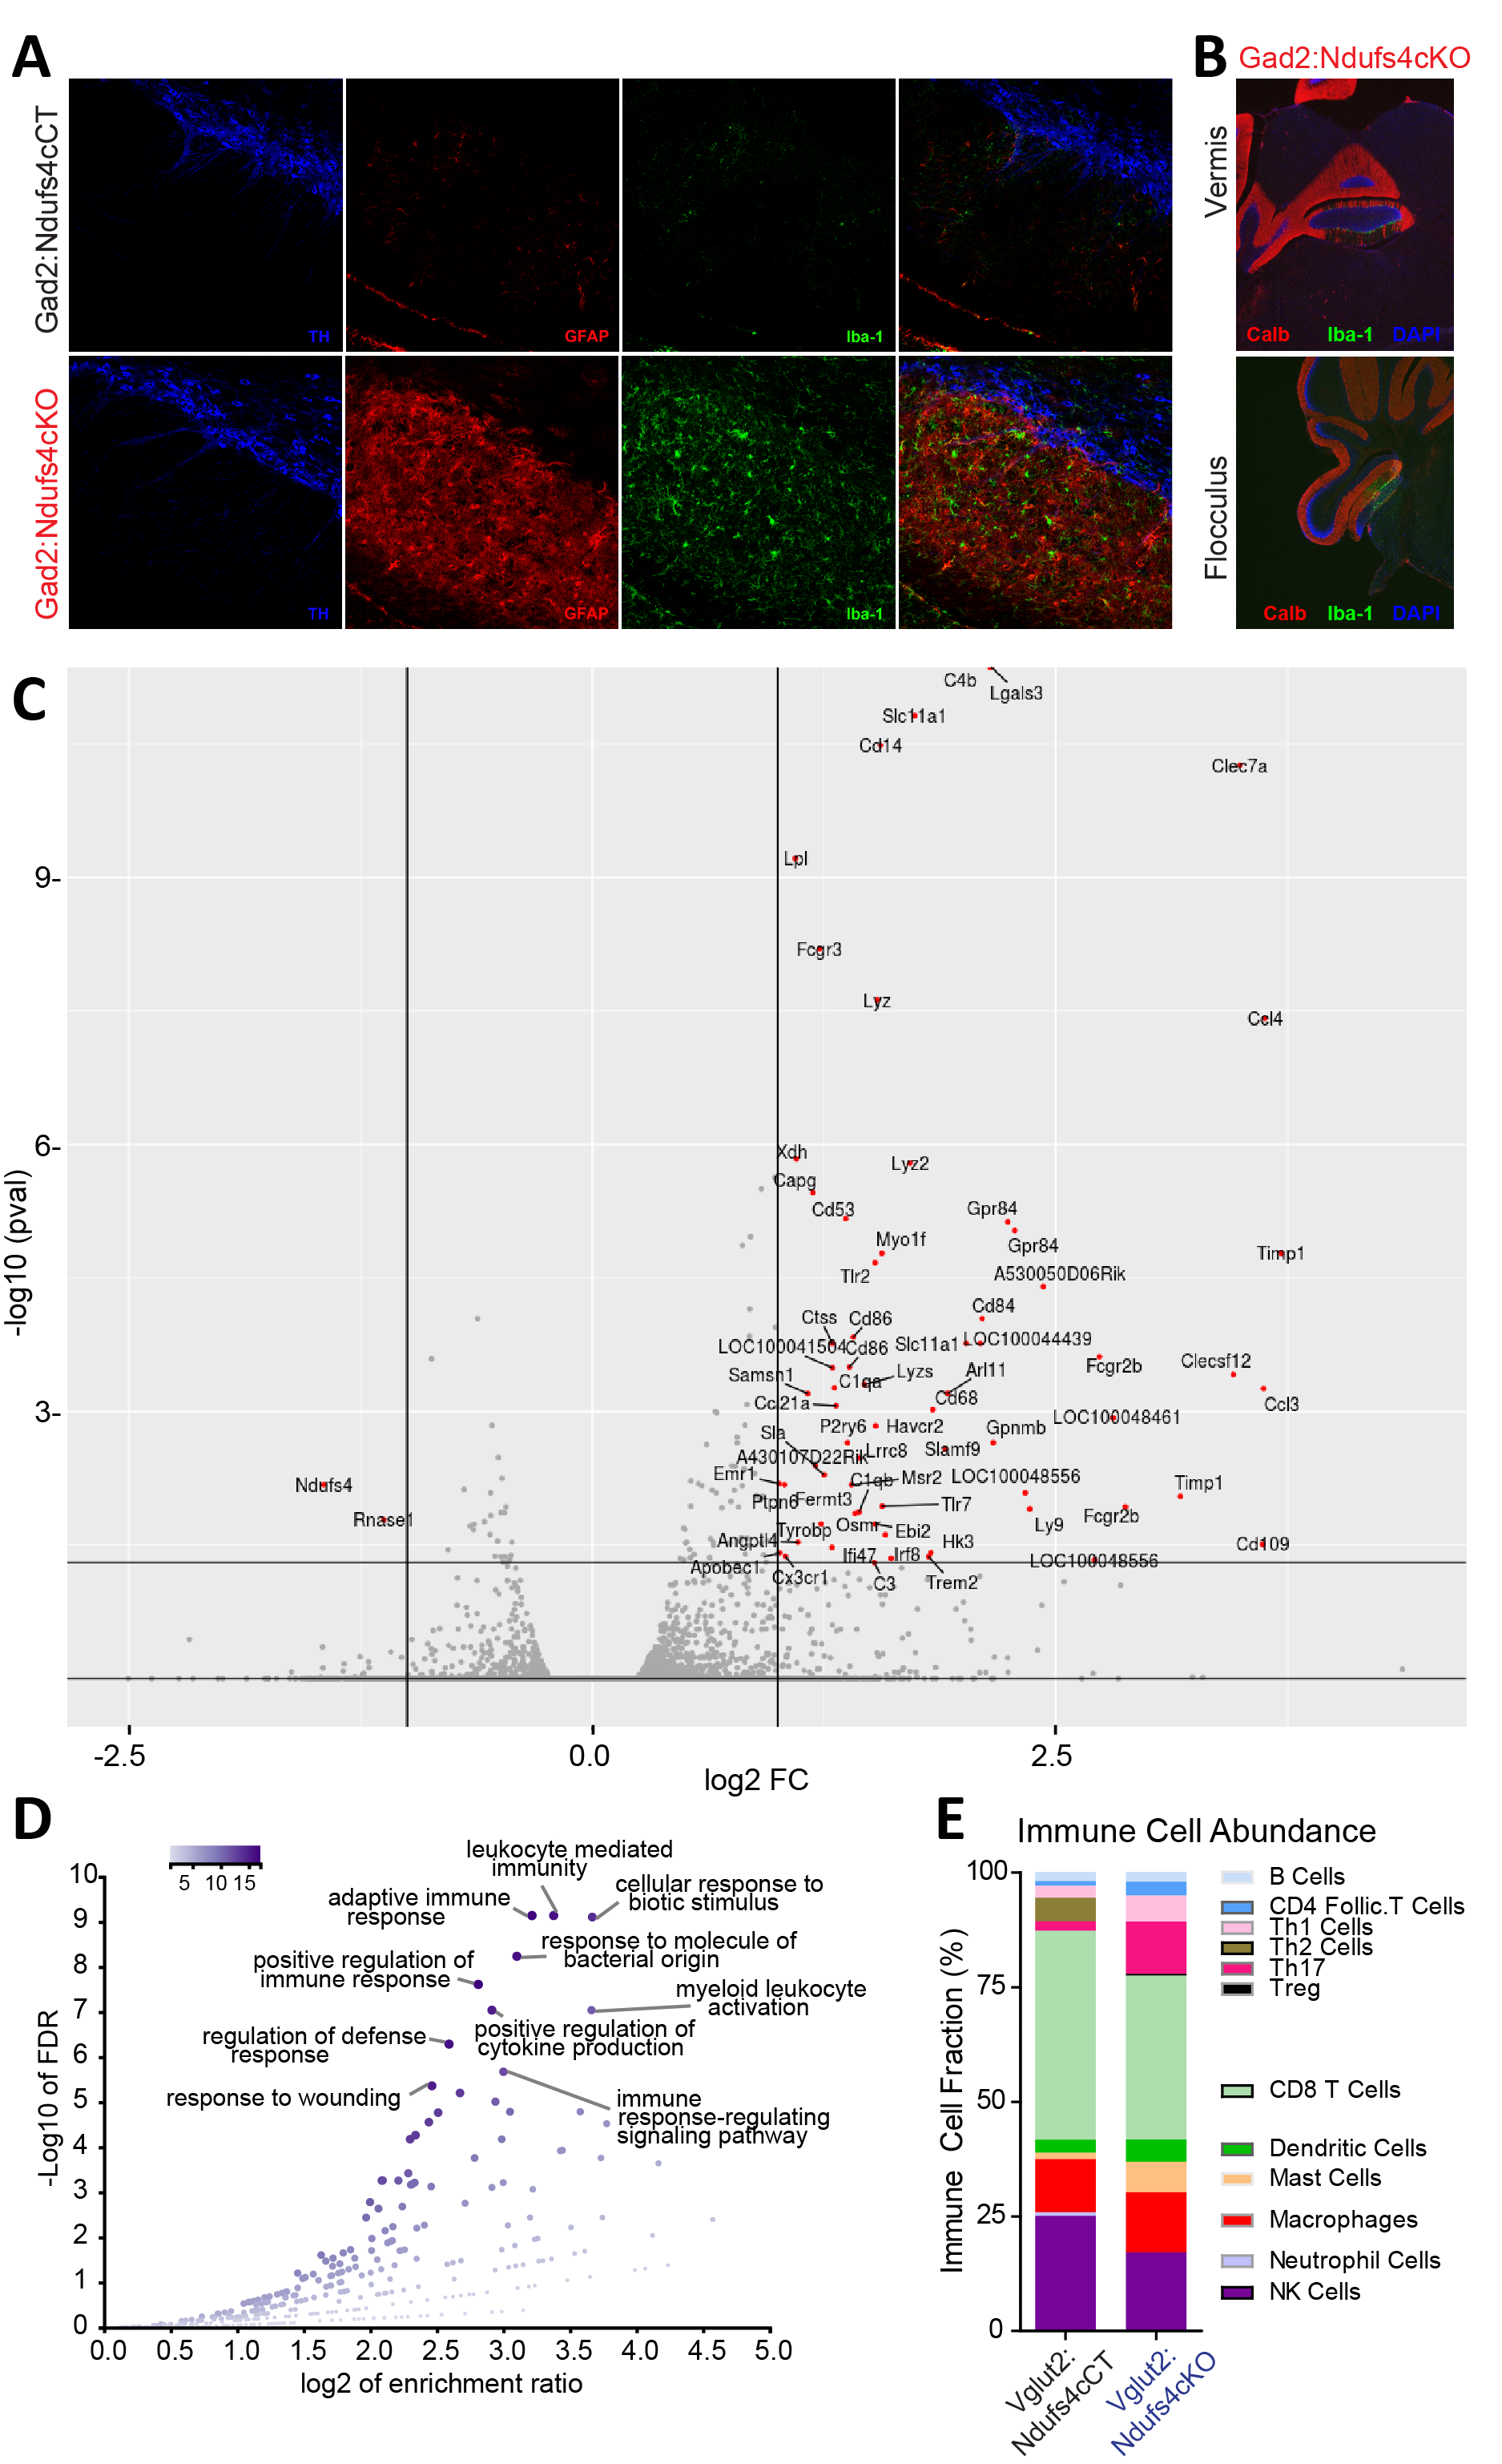

Supplement: supp [file elife-47163-supp-v1.zip › elife_poa_e47163_Figure_2_figure_supplement_2.tif]

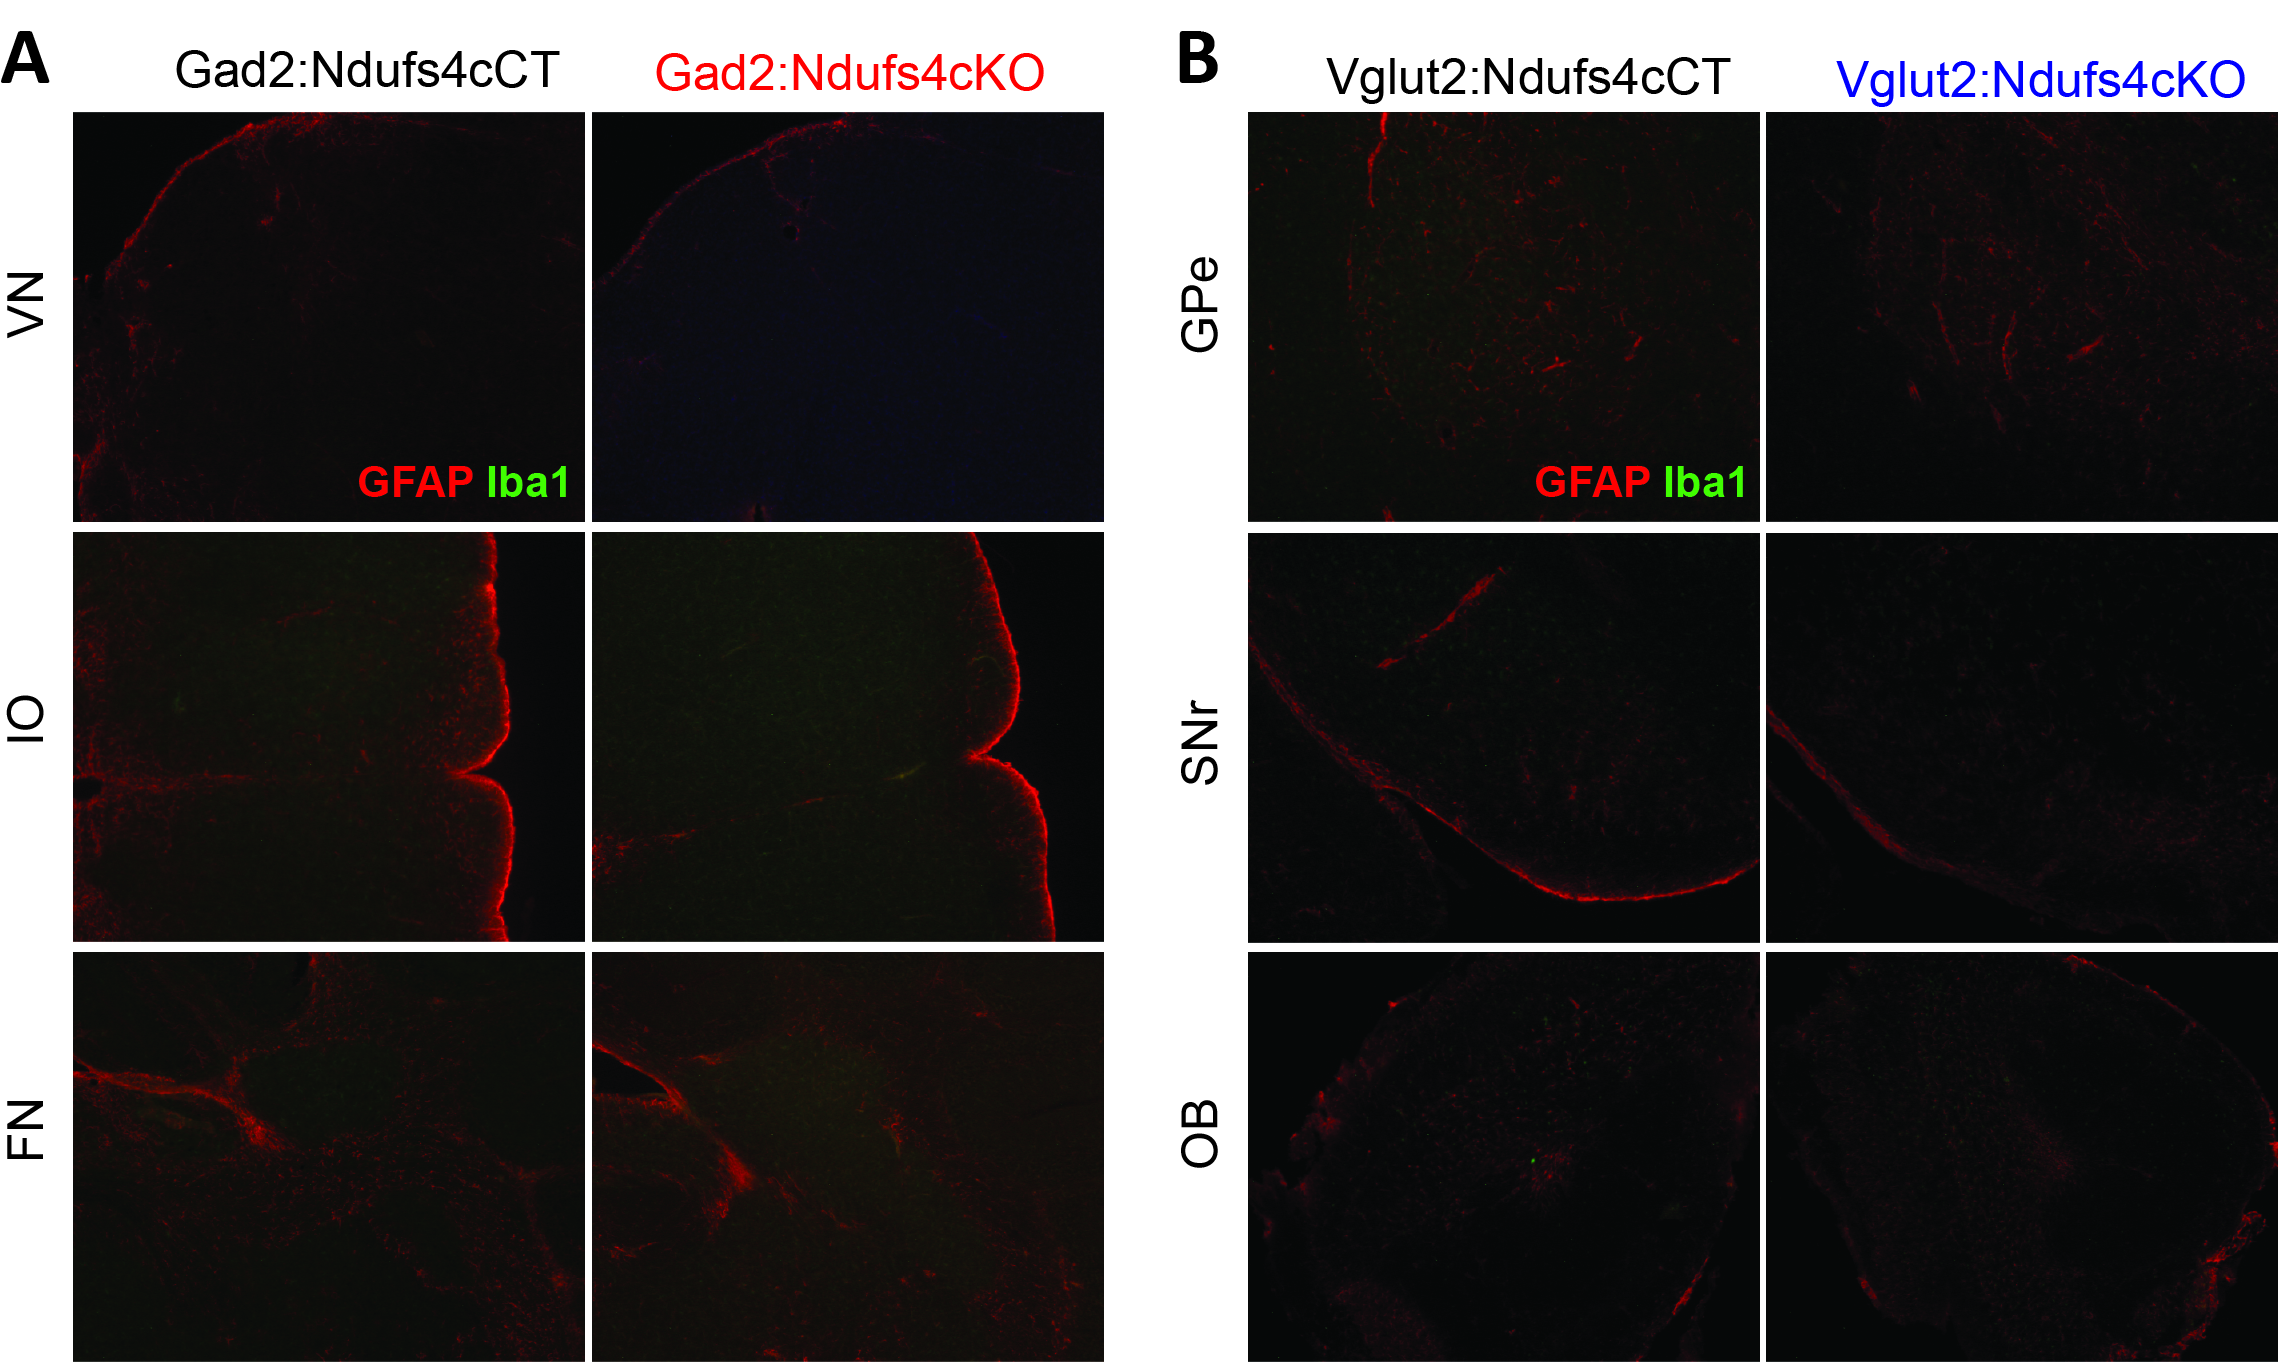

Supplement: supp [file elife-47163-supp-v1.zip › elife_poa_e47163_Figure_2_figure_supplement_1.tif]

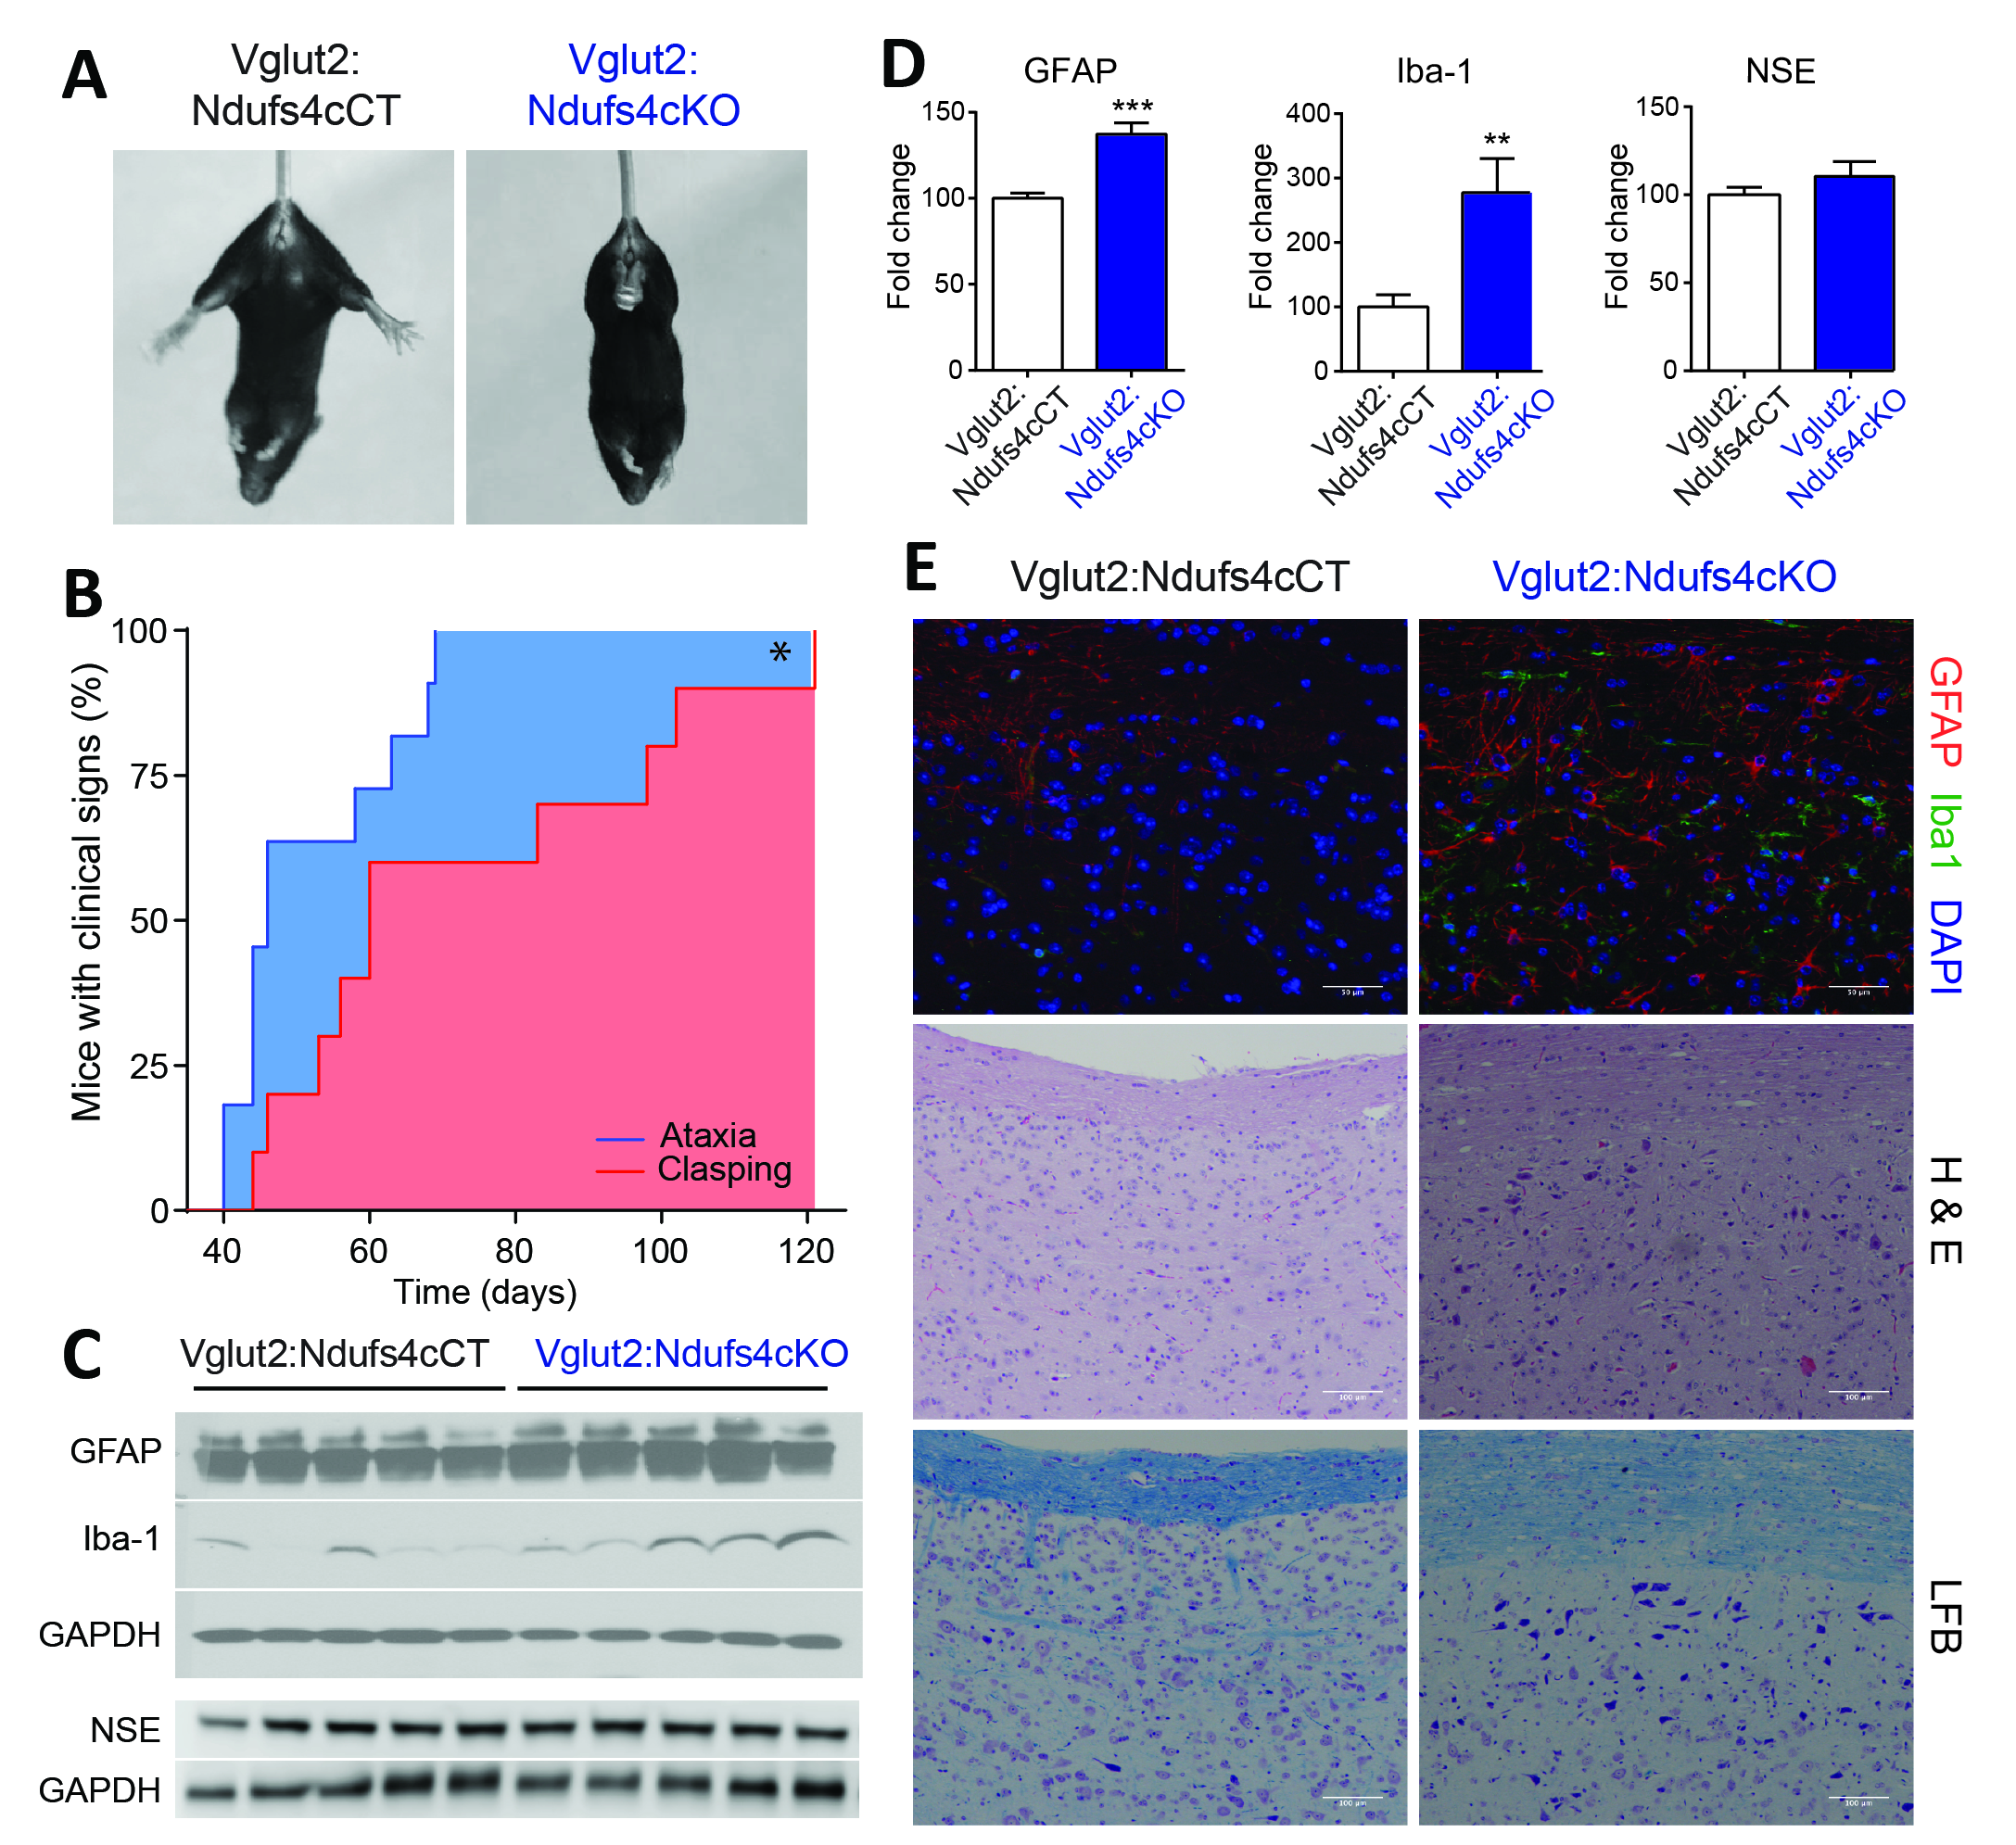

Supplement: supp [file elife-47163-supp-v1.zip › elife_poa_e47163_Figure_1_figure_supplement_3.tif]

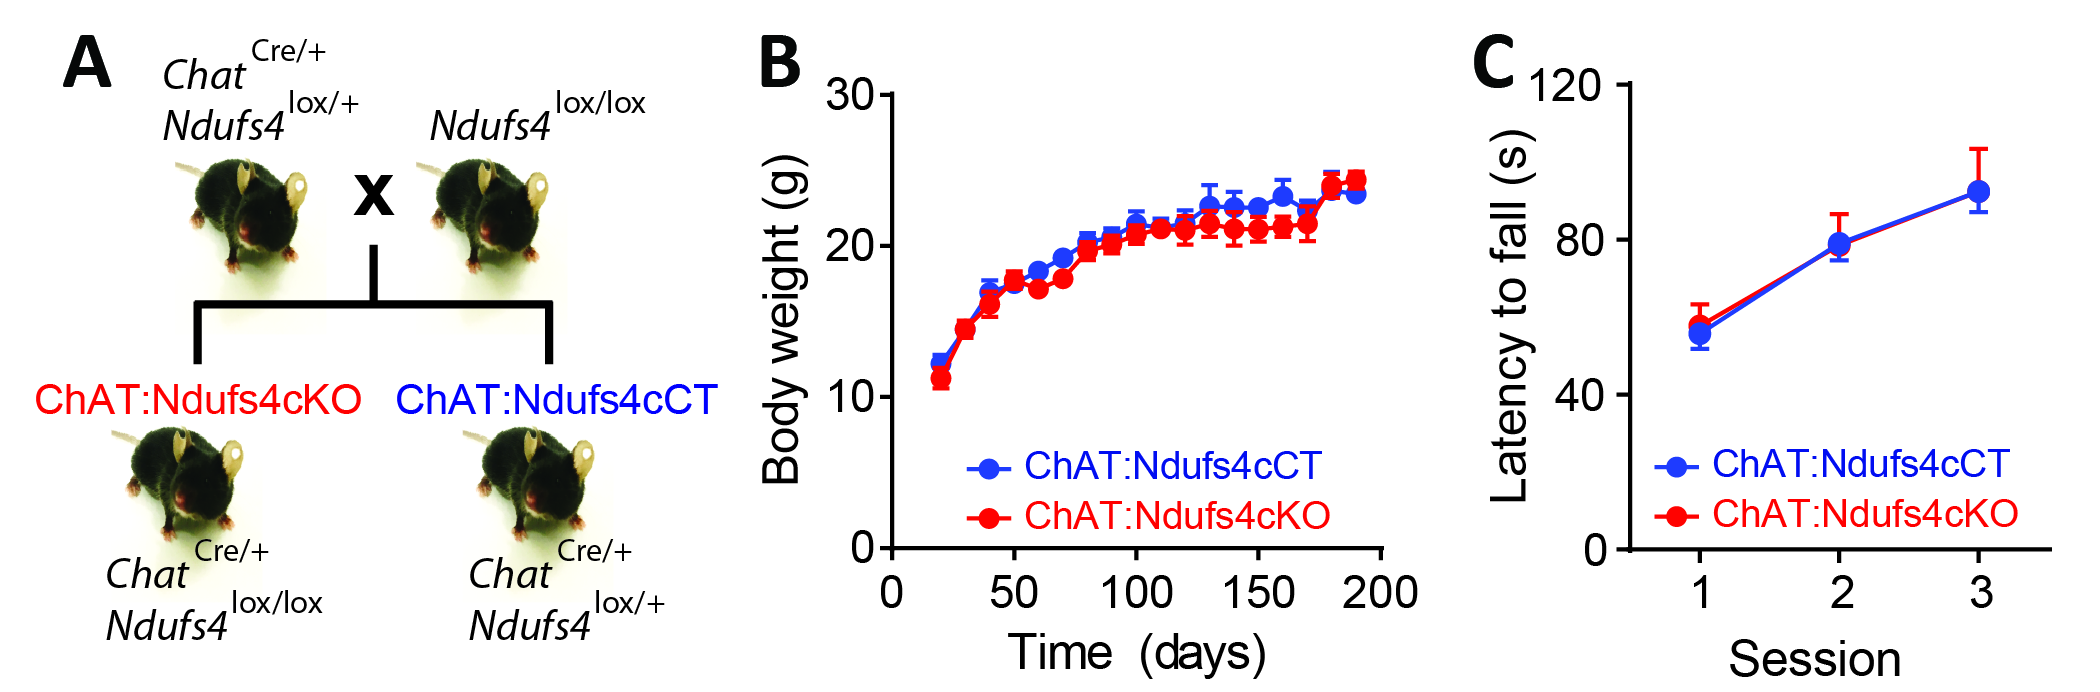

Supplement: supp [file elife-47163-supp-v1.zip › elife_poa_e47163_Figure_1_figure_supplement_1.tif]

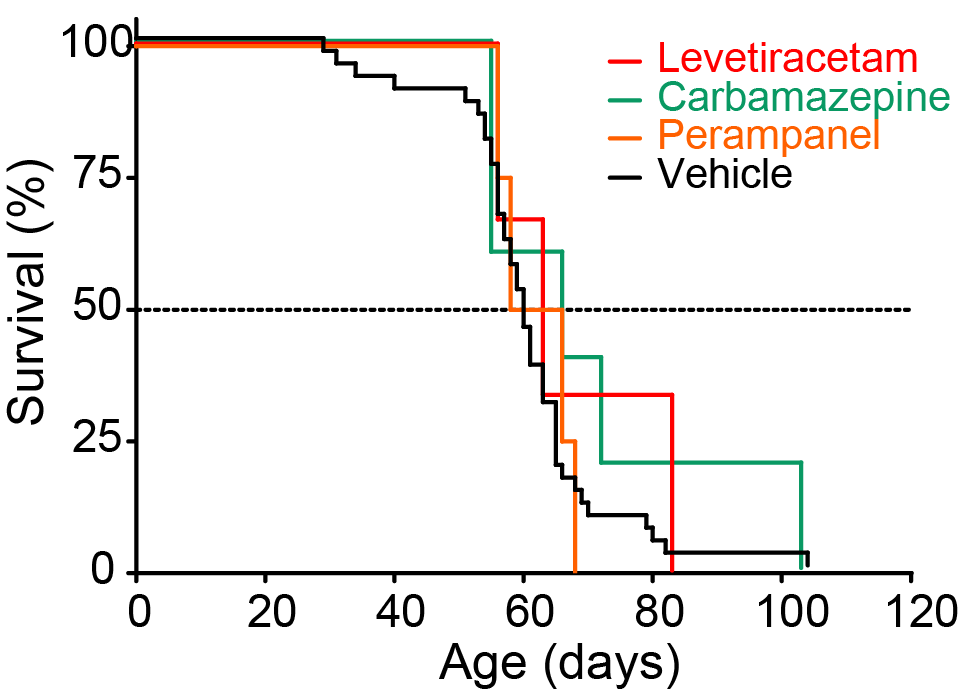

Supplement: supp [file elife-47163-supp-v1.zip › elife_poa_e47163_Figure_7_figure_supplement_2.tif]
